1

1 **Infective prey leads to a partial role reversal in a**  
2 **predator-prey interaction**

3

4

5 Veijo Kaitala<sup>1¶\*</sup>, Mikko Koivu-Jolma<sup>2¶</sup>, Jouni Laakso<sup>1</sup>

6 <sup>1</sup> Organismal and Evolutionary Biology Research Programme, Faculty of Biological and

7 Environmental Sciences, Helsinki University, Finland

8 <sup>2</sup> Department of Physics, Faculty of Science, Helsinki University, Finland

9 \* Corresponding author

10 E-mail: [Veijo.Kaitala@Helsinki.Fi](mailto:Veijo.Kaitala@Helsinki.Fi)

11 ¶These authors contributed equally to this work.

12

2

## 13 **Abstract**

14 An infective prey has the potential to infect, kill and consume its predator. Such a  
15 prey-predator relationship fundamentally differs from the classical Lotka-Volterra  
16 predator-prey premise because the prey can directly profit from the predator as a  
17 growth resource. Here we present a population dynamics model of partial role  
18 reversal in the predator-prey interaction. We parametrize the model to represent the  
19 predator-prey interaction of sea cucumber *Apostichopus japonicus* and bacterium  
20 *Vibrio splendidus*. We observe that two major factors stabilize the predator-prey  
21 interaction. First, the partial role reversal in the predator-prey community stabilizes  
22 the predator-prey interaction. Second, if the predator is a generalist and follows the  
23 type I functional response in attacking the prey, the predator-prey interaction is  
24 stable. We also analysed the conditions for species extinction. The extinction of the  
25 prey, *V. splendidus*, may occur when its growth rate is low, or in the absence of  
26 infectivity. The extinction of the predator, *A. japonicus*, may follow if either the  
27 infectivity of the prey is high or a moderately infective prey is abundant. We conclude  
28 that partial role reversal is an underestimated subject in predator-prey studies.

29

## 30 **Introduction**

31 The ability of a prey to utilize the predator as a food source is referred to as a role  
32 reversal in predator-prey interaction [1-3]. The prey may become an enemy to the  
33 predator. If the role reversal is not complete the predator continues to hunt the prey  
34 while becoming vulnerable to the predation itself. In the partial role reversal the

3

35 growth of the prey population relies on the prey's normal growth rate and on the  
36 additional resource acquiring by the infectivity, in particular, by its efficiency in killing  
37 and converting the predator into nutrition.

38 A partial role reversal in the aquatic environment can occur in the aquaculture of sea  
39 cucumbers (*Apostichopus japonicus*) which feeds bottom sediments inhabited by the  
40 opportunistic, potentially infective bacterium *Vibrio splendidus*. The sea cucumber  
41 belongs to the class Holothuroidea in the Phylum Echinodermata. It is a bottom  
42 dwelling marine deposit feeder that uses its tentacled mouth to consume the topmost  
43 sediment layer [4,5]. The sediment contains plant and animal debris, protozoa,  
44 diatoms and a diverse selection of bacteria [6-10]. The sediment also hosts the  
45 bacteria *V. splendidus* [10,11] which has been associated with seasonal epidemics of  
46 high mortality among the cultured sea cucumbers [12,13]. On the other hand, *V.*  
47 *splendidus* can also coexist in the gut of healthy sea cucumbers [14,15]. Because  
48 bacteria generally form an important food source for the sea cucumber, *A. japonicus*  
49 [5] can be treated as a predator to *V. splendidus*. The interaction is not tight in the  
50 sense of traditional Lotka-Volterra predator interaction since both species can also  
51 consume other resources.

52 We address the problem of partial role reversal in the predator-prey interaction by  
53 presenting a predator-infective prey model to analyse the dynamics and coexistence  
54 of the species in the community. After presenting the basic framework of the model  
55 we parametrize the model for an opportunistic pathogenic bacteria and the  
56 commercially cultivated sea cucumber, an economically important species in  
57 aquaculture. The sea cucumber is appreciated as a delicacy and aphrodisiac widely in

4

58 Asia. Even though the catches from the wild populations have drastically declined, the  
59 production of cultured sea cucumbers in year 2014 was over 200000 tonnes in China  
60 alone. [16]. According our results the species most likely coexist at a stable  
61 equilibrium.

62 We also analysed the conditions for species extinctions. For the predator the  
63 extinction depends on the infectivity of the prey, and its population size as well as the  
64 attack rate of the predator. The possibility of recognizing the effects of an infective  
65 prey within a food web is thus meaningful both scientifically and economically.

66

## 67 **Conceptual model description**

68 The predator (S) and the prey (C) interact according to a conventional predator-prey  
69 model (Fig 1). The predator population grows by consuming the prey (i). However,  
70 both species also use other resources for growth ((vi) and (vii)), meaning that each of  
71 them can survive as a single species population. Thus, we are dealing with a generalist  
72 predator. However, in a special case the predator can be specialist. As the prey is also  
73 pathogenic to the predator, a part of the predator population is infected (ii),  
74 increasing the population size of infected predators (I). An infected predator can  
75 recuperate (iii), die naturally (iv), or become a growth resource for the pathogenic  
76 prey (v).

77

78

79 **Fig 1. A schematic presentation of the predator-infective prey model.**

5

80 The predator (S) and the prey (C) interact according to a conventional predator-prey  
81 model. However, the prey is pathogenic to the predator, and a part of the predator  
82 population is infected (I). An infected predator can recover, die naturally, or become  
83 consumed by the pathogenic prey.

84

85 A distinctive aspect in our predator-prey interaction is that both the prey and the  
86 predator are only a part of a food web. Both species have a base growth rate that is  
87 independent of their mutual interaction, and they both are able to grow  
88 independently according to the respective carrying capacity of the environment ((vi)  
89 and (vii) in Fig 1).

90

## 91 **Modelling partial role reversal in predator-prey** 92 **interaction**

93 Let C, S and I denote the abundances of the prey, predator and infected predator  
94 populations, respectively. The differential equation model for the dynamics of the  
95 populations are given as

$$96 \quad \frac{dC}{dt} = r_C C \left(1 - \frac{C}{K_C}\right) - CaS + e_{IC} \mu_{inf} I \quad (1)$$

97

$$98 \quad \frac{dS}{dt} = r_S S \left(1 - \frac{S}{K_S}\right) - e_{SI} \alpha CaS + (1 - \alpha) e_{CS} CaS - \mu_I S + \beta I \quad (2)$$

99

$$100 \quad \frac{dI}{dt} = e_{SI} \alpha CaS - I(\mu_I + \mu_{inf} + \beta) \quad (3)$$

6

101

102 where the increases of the prey and predator abundances are both defined as logistic  
103 growth. Parameters  $r_C$ ,  $K_C$ ,  $r_S$  and  $K_S$  are the growth rates and carrying capacities of  
104 the prey and predator, respectively. Parameter  $a$  ( $0 \leq a \leq 1$ ) denotes the attack rate of  
105 the predator  $S$ . This can be interpreted either as a fraction of the feeding area grazed  
106 during a time step, or it can equally be interpreted as the prey selectivity coefficient of  
107 the predator. Thus, the total number of the prey harvested by the predator is  $aC$ , and  
108 the harvesting is described as Type I functional response. Parameter  $\alpha$  denotes the  
109 fraction of the infective prey from the total prey population. Thus, from the predation  
110 rate  $CaS$  fraction  $(1 - \alpha)$  increases the growth rate of the healthy predator  
111 population with a prey to predator growth conversion efficiency  $e_{CS}$ . The rest of the  
112 harvested prey,  $\alpha CaS$ , infects the predators at a conversion rate  $e_{SI}$ . The infected the  
113 predators end up in the infected predator population  $I$ . Parameter  $\beta$  denotes the  
114 recovery rate of the infected predators. Parameters  $\mu_{inf}$  and  $e_{IC}$  denote the predator  
115 infection mortality and predator to prey conversion efficiency, respectively. Finally,  $\mu_I$   
116 denotes the natural predator mortality.

117 Our model follows the basic structure of the traditional predator-prey Lotka-Volterra  
118 model in that the predation is modelled as Type I functional response, and that the  
119 healthy harvest is used for the growth of the of the predator. The model differs from  
120 the Lotka-Volterra model in that both the susceptible predator and the infective prey  
121 have their own logistic growth functions implying that they are generalists rather than  
122 specialists. The infected predator population grows only at the expense of the  
123 infections of the healthy predators. The infected predators also serve as a resource for

7

124 the prey growth as they become diseased.

## 125 **Parametrization of the model**

126 Most of the parameters were chosen according to the suitable values found from the  
127 literature. Conversion efficiencies were calculated as the ratio of dry weights of the  
128 predator and the prey multiplied by ecological efficiency. Ecological efficiency was set  
129 to 0.25 for the sea cucumber, and to 0.5 for the bacteria [17,18].

130 Because we could not find the dry weight of *V. splendidus*, we used the dry weight of  
131 *E. coli* [19]. The dry weight of *A. japonicus* is calculated according to the article by Sun  
132 et al., where it was stated that the dry weight of *A. japonicus* equals 0.075×wet weight  
133 [4]. The mean wet weight  $m_{Aj}$  was set at 150g [20].

134 Prey to predator conversion efficiency is calculated as  $e_{CS} = \frac{m_{bact}}{m_{Aj}}0.25 = \frac{0.28 \cdot 10^{-12}g}{150g \cdot 0.075}$   
135  $0.25 = 6.22 \cdot 10^{-15}$ .

136 Predator to prey conversion efficiency is  $e_{IC} = \frac{m_{Aj}}{m_{bact}}0.5 = \frac{150g \cdot 0.075}{0.28 \cdot 10^{-12}g}0.5 = 1.00 \cdot 10^{13}$ .

137 According to the empirical study by Lysenkov et al. the natural population density of  
138 *A. japonicus* is 0.14 individuals per square meter, even though the observed density  
139 has fallen to 0.023 individuals per square meter because of illegal harvesting [20].

140 Therefore, the area of the feeding unit is set to  $A_{KS} = \frac{1m^2}{0.14} = 7m^2$  and depth of

141 foraging to 1cm. We calculated the predator attack rate using the formula

142 
$$a = \frac{m_{Aj}f}{\rho V} = \frac{150g \cdot 5.3 \cdot 10^{-3}g^{-1}h^{-1}mg}{1gcm^{-3} \cdot 70000cm^2 \cdot 1cm} = 1.14 \cdot 10^{-5}h^{-1} = 2.73 \cdot 10^{-4}d^{-1}$$

143 where  $m_{Aj}$  is the wet weight of the sea cucumber and  $f$  is the amount of sediment

8

144 eaten by the sea cucumber per hour per gram of sea cucumber [4],  $\rho$  is the density of  
145 the sediment as given by Kennish [9], and  $V$  is the volume of the feeding unit. The  
146 resulting attack rate is the nominal portion of the available prey eaten within a time  
147 step. Because the actual attack rate depends also from the selectivity of the predator,  
148 a range of attack rate values around the nominal value was used in model analysis and  
149 numerical simulations.

150 We have taken the carrying capacity of the bacteria  $K_C$  from the literature [7,11]. For  
151 the sea cucumber carrying capacity  $K_S$  we tested a range of values, but for consistency  
152 in the shown simulation results  $K_S$  is always 10000.

153 The symbols and parameters used in the model and are shown in Table 1.

154

155

156

157 **Table 1.** Symbols and parameter values

| <b>Parameter</b>                 |          | <b>Value</b>           | <b>Unit</b>                                      |
|----------------------------------|----------|------------------------|--------------------------------------------------|
| Susceptible predator             | <b>S</b> | <i>A. japonicus</i> ,  | individ. [ <i>i</i> ]                            |
| Infected predator                | <b>I</b> | <i>A. japonicus</i> ,  | individ. [ <i>i</i> ]                            |
| Infective prey                   | <b>C</b> | <i>V. splendidus</i> , | individ. [ <i>i</i> ]                            |
| Infected prey growth rate        | $r_c$    | 0.5, 5.0, 50           | [ <i>i</i> / <i>i</i> · <i>d</i> <sup>-1</sup> ] |
| Susceptible predator growth rate | $r_s$    | 0.02                   | [ <i>i</i> / <i>i</i> · <i>d</i> <sup>-1</sup> ] |
| Prey K                           | $K_c$    | $1 \cdot 10^{13}$      | [ <i>i</i> ]                                     |



9

|     |                                              |             |                                               |                        |
|-----|----------------------------------------------|-------------|-----------------------------------------------|------------------------|
| 158 | Predator K                                   | $K_s$       | 10000                                         | $[i]$                  |
|     | Predator infection mortality due to the prey | $\mu_{inf}$ | 0.8                                           | $[i/i \cdot d^{-1}]$   |
|     | Predator mortality                           | $\mu_I$     | 0.01                                          | $[i/i \cdot d^{-1}]$   |
|     | Predator attack rate                         | $a$         | $1.0 \cdot 10^{-11} \dots 10.0 \cdot 10^{-4}$ | $[i/i^2 \cdot d^{-1}]$ |
|     | Prey to predator conversion efficiency       | $e_{CS}$    | $6.22 \cdot 10^{-15}$                         | $[i/i]$                |
|     | Predator to prey conversion efficiency       | $e_{IC}$    | $1.0 \cdot 10^{13}$                           | $[i/i]$                |
|     | Infectivity of the prey                      | $e_{SI}$    | $10^{-13} \dots 10^{-9}$                      | $[i/i]$                |
|     | Proportion of infective prey                 | $\alpha$    | $0.001 \dots 1.0$                             | $[i/i]$                |
|     | Infected predator recovery                   | $\beta$     | 0.2                                           | $[i/i \cdot d^{-1}]$   |

159

## 160 **Model analyses**

161

### 162 **Population equilibria**

163 The equilibrium of the community is the starting point of the analysis of community

164 behaviour. The equilibrium is defined by assuming the time derivatives in the

165 population equations (1)-(3) equal to zero:

166

$$167 \quad 0 = r_c C \left(1 - \frac{C}{K_c}\right) - CaS + e_{IC} \mu_{inf} I \quad (4)$$

10

168

$$169 \quad 0 = r_S S \left(1 - \frac{S}{K_S}\right) - e_{SI} \alpha C a S + (1 - \alpha) e_{CS} C a S - \mu_I S + \beta I \quad (5)$$

170

$$171 \quad 0 = e_{SI} \alpha C a S - I(\mu_I + \mu_{inf} + \beta) \quad (6)$$

172

173 Inserting  $I$  from eq. (6) into (4) and (5) and dividing the resulting equations by  $C$  and  $S$ ,

174 respectively, we get

$$175 \quad 0 = r_C \left(1 - \frac{C}{K_C}\right) - a S + e_{IC} \mu_{inf} z S \quad (7)$$

$$176 \quad 0 = r_S \left(1 - \frac{S}{K_S}\right) - e_{SI} \alpha C a + e_{CS} (1 - \alpha) C a - \mu_I + \beta z C \quad (8)$$

177 where  $z = e_{SI} \alpha a / (\mu_I + \mu_{inf} + \beta)$ .

178 Linear equations (7) and (8) can be presented in a matrix form

$$179 \quad A \begin{bmatrix} C \\ S \end{bmatrix} = \begin{bmatrix} r_C \\ r_S - \mu_I \end{bmatrix} \quad (9)$$

180 where

$$181 \quad A = \begin{bmatrix} a_{11} & a_{12} \\ a_{21} & a_{22} \end{bmatrix} = \begin{bmatrix} \frac{r_C}{K_C} & a - e_{IC} \mu_{inf} z \\ e_{SI} \alpha a - e_{CS} (1 - \alpha) a - \beta z & \frac{r_S}{K_S} \end{bmatrix} \quad (10)$$

182 The solution of eqs. (9) and (10) is given as

$$183 \quad \dot{C} = \frac{1}{a_{11} a_{22} - a_{12} a_{21}} (a_{22} r_C - a_{12} (r_S - \mu_I)) \quad (11)$$

$$184 \quad \dot{S} = \frac{1}{a_{11} a_{22} - a_{12} a_{21}} (-a_{21} r_C + a_{11} (r_S - \mu_I)) \quad (12)$$

185

186 Infected predators are then calculated as  $I = z \hat{C} \hat{S} = \hat{C} \hat{S} e_{SI} \alpha a / (\mu_I + \mu_{inf} + \beta)$  (eq.

187 (6)).

188 The equilibrium states of interest are the following:

11

- 189 a) Both species coexists at a general equilibrium:  $\dot{C}, \dot{S}, \dot{I} > 0$ . Stability of this  
190 equilibrium represent continuing coexistence of the species.  
191 In the absence of species interaction the environmental carrying capacity of  
192 the prey is equal to  $K_C$  and that of the predator is equal to  $(r_S - \mu_I)K_S/r_S$ .
- 193 b) Infective prey exists but is zero:  $\dot{C} = 0, \dot{S} > 0, \dot{I} = 0$ . This represent an extinction  
194 of the prey.
- 195 c) Predator is absent:  $\dot{C} > 0, \dot{S} = \dot{I} = 0$ . This represents an extinction of the  
196 predator.

## 197 Analytical results

198 The analysis of the model presents us three possible outcomes. Either the prey or the  
199 predator drives the other to extinction, or both populations coexist in a stable  
200 equilibrium.

## 201 Numerical simulations

202 The numerical simulations of the model (1)-(3) were performed out using Matlab  
203 R2020b. Numerical simulations were in accordance with the analytical results (Section  
204 "Population equilibria"). Both the prey and the predator were able to drive the other  
205 to extinction. All simulation results with positive coexisting populations were locally  
206 stable. The parameters used in the simulations are described in Section  
207 "Parametrization of the model". Because simulations exemplify the partial role  
208 reversal between *A. japonicus* and *V. splendidus*, respective conversion efficiencies  
209 were used throughout, as well as the high mortality rates shown to be associated with  
210 the infection [12,13]. The effects of infectivity of the prey  $e_{SI}$ , proportion of the

12

211 infective prey  $\alpha$ , and the attack rate  $a$  were tested using wide parameter ranges.

212 Though the outbreaks caused by *V. splendidus* have been associated with high

213 mortality rates, we tested the model also with low infection mortality rates and high

214 recovery rates. Even when infection mortality  $\mu_{inf}$  and infected predator recovery  $\beta$

215 were 0.3 and 0.7, respectively, the results remained qualitatively same. Initial

216 population sizes did not affect the results, and the model gives consistent results.

## 217 **Results**

218 For an opportunist prey with a high environmental growth rate the level of infectivity,

219  $e_{SI}$ , is not crucial (Fig 2). The prey population size will settle around the level of

220 carrying capacity  $K_C$ . A low infectivity  $e_{SI}$  combined with a high environmental growth

221 rate  $r_C$  of the prey can be beneficial also for the predator because the predator is able

222 to sustain population levels above the environmental carrying capacity  $(r_S - \mu_I)K_S /$

223  $r_S$ . Rising the level of infectivity, however, decreases the predator population. To the

224 contrary, the population size of a prey with slow environmental growth depends on

225 the level of infectivity. Low infectivity leads to the extinction of the slowly growing

226 prey.

227

228 **Fig 2. Infectivity affects both prey and predator population sizes.**

229 For low infectivity  $e_{SI}$  a higher outside prey growth rate  $r_C$  supports larger prey

230 population than a lower growth rate, but this is reversed if  $e_{SI}$  increases enough. After

231 the turning point (o), where high and low growth rates of the prey provide equal

232 population sizes, an increase in infectivity  $e_{SI}$  of the prey results in greater prey and

13

233 lesser predator population sizes. If the infectivity is increased even more, the trend of  
234 the prey population turns into decreasing. At the extinction of the prey (at low  
235 infectivity values and low prey growth rate) the predator population size settles  
236 down at its environmental carrying capacity  $\frac{(r_S - \mu_I)K_S}{r_S} = 5000$ . Subfigures A and B  
237 show the full scale of the population sizes, whereas subfigure C displays a closer view  
238 to the predator population at the turning point (o). Red, purple and blue lines are fast  
239 ( $r_C=50$ ), medium ( $r_C=5$ ) and slow ( $r_C=0.5$ ) growth rates. The predator's attack rate  
240  $a=3.0 \cdot 10^{-4}$  and the infective proportion of the prey  $\alpha=0.001$ . Infectivity  $e_{SI}$  ranges from  
241  $10^{-13}$  to  $10^{-9}$ .

242

243 High infectivity  $e_{SI}$  increases the population size of a slowly growing prey because  
244 increasing infectivity allows the prey to reach a higher prey population size as  
245 compared to a prey with a higher growth rate  $r_C$  (Fig 2). However, due to the high  
246 mortality  $\mu_{inf}$  associated with the infection, a too high level of infectivity causes the  
247 extinction of the predator and a decline in the prey population size. Likewise, in the  
248 case of fast growing prey, very high infectivity leads the prey population size to settle  
249 at the environmental carrying capacity.

250

251 Fig 2 also illustrates the presence of a turning point such that the order of the  
252 population sizes will change with the change of a parameter. When  $e_{SI} = 1.22e-10$ ,  
253 making  $a_{12} = 0$  (eq. 8), the equilibrium population size of the prey equals to its  
254 environmental carrying capacity  $\hat{C} = K_C$ . At the same value of infectivity the  
255 equilibrium population size of the predator will be  $\hat{S} = 4865$ . Below the turning point

14

256 slow prey growth rates supports lower prey population sizes than higher growth rates.

257 When the parameter  $e_{SI}$  passes the turning point then the order of the population

258 sizes is reversed. The effect of the turning point to the population sizes of the

259 predator is opposite. Note that the turning point is not a uniquely defined concept but

260 always related a chosen parameter. This is because the condition  $a_{12} = 0$  can become

261 true for choosing appropriate values for  $e_{SI}, \alpha, e_{IC}$  and  $\mu_{inf}$ . A comparable analysis can

262 be carried out for the solutions with  $a_{21} = 0$ .

263

264 Infectivity  $e_{SI}$  and the proportion of infective prey in the total prey population  $\alpha$  have

265 parallel but not completely interchangeable effects on the population sizes of the prey

266 and predator (Fig 3). If the prey is very weakly infective ( $e_{SI}=10^{-13}$ , Figs 3A,B), the

267 predator will survive any proportion of the infective prey, and can even completely

268 eradicate a slow growing prey. In contrast, if the infectivity is high ( $e_{SI}=10^{-11}$ , Figs

269 3C,D), then the predator will become extinct even at relatively low infective prey

270 densities. This happens regardless of the prey growth rate.

271

272 **Fig 3. Proportion of infective prey  $\alpha$  affects the population in the same way as**

273 **infectivity  $e_{SI}$ .**

274 Low infectivity of prey,  $e_{SI}$ , supports lower prey population sizes (A) and higher

275 predator population sizes (B) than high infectivity (C and D, respectively). Slowly

276 growing prey with low infectivity can proliferate only if the majority of the prey are

277 infective (A). Even high proportions of infective prey cause only a slight decrease in

278 predator population (B). High infectivity  $e_{SI}$  prevents the extinction of the prey. Highly

15

279 infective prey thrives best when it forms relatively small part of the prey population

280 (C) because the predator becomes extinct if the majority of the prey are infective

281 ( $\alpha \geq 0.4$ ) (D). The whole range of final population sizes in subfigures A and B fit

282 within the dotted lines in subfigures C and D, respectively. Red, purple and blue lines

283 are fast ( $r_c=50$ ), medium ( $r_c=5$ ) and slow ( $r_c=0.5$ ) growth rates. Infectivity values are

284  $e_{SI}=10^{-13}$  in subfigures A and B, and  $e_{SI}=10^{-11}$  in subfigures C and D.

285

286 If attack rate approaches zero both the prey and the predator population sizes tend

287 towards the environmental carrying capacity regardless of the infectivity (Fig 4).

288 Increasing attack rate may have different effects on the prey and predator sizes. When

289 the value of the infectivity remains low an increase in the attack rate benefits the

290 predator (Fig 4B). High growth rate of the prey results in larger predator population

291 than low growth rate. If the value of the infectivity is increased slightly (moderate

292 infectivity) an increment in growth rate decreases predator population sizes (Fig 4D).

293 In both cases increasing attack rate decreases the prey population size (Figs 4A,C).

294

295 **Fig 4. An increase in the infectivity may reverse the effect of predator attack rate on**

296 **the predator population size.**

297 In subfigures A and B the prey's infectivity  $e_{SI}$  is weak. Increasing the predator attack

298 rate  $a$  decreases prey and increases predator population sizes. In contrast,  $e_{SI}$  in

299 subfigures C and D is slightly greater, and increasing attack rate decreases the

300 population levels of the prey as well as of the predator. As the attack rate decreases,

301 the population sizes approach their respective environmental carrying capacities. Red,

16

302 purple and blue lines are fast ( $r_C=50$ ), medium ( $r_C=5$ ) and slow ( $r_C=0.5$ ) growth rates.

303 The infectivity values are  $e_{SI}=10^{-13}$  in subfigures A and B, and  $e_{SI}=10^{-10}$  in subfigures C

304 and D.

### 305 **Extinction of the species**

306 We consider here the possibility of extinction of the predator or the prey. The

307 questions of interest are: 1) Under which conditions the predator can drive the prey to

308 extinction such that the species community would approach lie at a “predator only”

309 equilibrium  $\dot{C} = 0, \dot{S} > 0, \dot{I} = 0$ . 2) Alternatively, we ask under what conditions the prey

310 can eradicate the predator such that the species community would ultimately lie the

311 “prey only” equilibrium  $\dot{C} > 0, \dot{S} = \dot{I} = 0$ .

312 Consider first the “predator only “ equilibrium  $\dot{C} = 0, \dot{S} = \frac{r_S - \mu_I}{r_S} K_S, \dot{I} = 0$ , that is, the

313 sea cucumber lies at its carrying capacity and *V. splendidus* has been driven to

314 extinction. If the equilibrium is locally stable then the extinction of *V. splendidus* is

315 expected to occur. The local stability of the linearized dynamics at the equilibrium can

316 be analysed studying the properties of the following Jacobian matrix

$$317 \quad J = \begin{bmatrix} J_{11} & J_{12} & J_{13} \\ J_{21} & J_{22} & J_{23} \\ J_{31} & J_{32} & J_{33} \end{bmatrix} = \begin{bmatrix} r_C - \frac{\alpha(r_S - \mu_I)}{r_S} K_S & 0 & e_{IC}\mu_{inf} \\ a\frac{r_S - \mu_I}{r_S} K_S [e_{CS}(1 - \alpha) - e_{SI}\alpha] & -r_S + \mu_I & \beta \\ ae_{SI}\alpha \frac{r_S - \mu_I}{r_S} K_S & 0 & -(\mu_I + \mu_{inf} + \beta) \end{bmatrix}$$

318

319 Recall that if the real parts of the eigenvalues of J are all negative the system is locally

320 stable. It can be shown that the first eigenvalue is  $\lambda_1 = -r_S + \mu_I$  which we assume to

321 be negative. The remaining two eigenvalues depend on the submatrix where line 2



17

322 and column 2 are deleted in matrix  $J$ . The eigenvalues  $\lambda_2, \lambda_3$  both have negative real

323 parts if and only if [21]

$$324 \quad J_{11} + J_{33} = \left( r_C - a \frac{r_S - \mu_I}{r_S} K_S \right) - (\mu_I + \mu_{inf} + \beta) < 0$$

325 and

$$326 \quad J_{11}J_{33} - J_{13}J_{31} = - \left( r_C - a \frac{r_S - \mu_I}{r_S} K_S \right) (\mu_I + \mu_{inf} + \beta) - e_{IC} \mu_{inf} a e_{SI} \alpha \frac{r_S - \mu_I}{r_S} K_S > 0$$

327 In this case extinction occurs. For example, if the proportion of infective prey is low

328 ( $\alpha \approx 0$ ) and the growth rate is low ( $r_C < a \frac{r_S - \mu_I}{r_S} K_S$ ) then the both conditions become

329 true and the predator will eradicate the prey. High proportion of infective prey, high

330 energetic efficiency and high carrying capacity may protect the prey from extinction.

331

332 The extinction of the prey depends crucially also on the attack rate of the predator

333 (Fig 5). There is a threshold value or a minimum attack rate at which the predator can

334 cause the extinction of the prey.

335 **Fig 5. Predator attack rate affects the extinction of prey.**

336 Extinction of prey is possible if the predator's attack rate is higher than the threshold

337 defined by the prey's growth rate. Fast growing prey survives higher predator attack

338 rate than slow growing. If the prey's infectivity  $e_{SI}$  is high, only a small fraction  $\alpha$  of the

339 prey population needs to be infective to escape the extinction. Prey growth rate

340  $r_C=10$ .

341

342 If the prey is a specialist such that it consumes only the predator ( $r_C=0$ ), then the

343 extinction can be due to low infectivity or insufficient infective population. Yet, even a

18

344 low prey growth rate may keep the prey population alive, if the prey is infective

345 enough. Because infective prey can survive when its outside growth rate  $r_C=0$ , a

346 positive growth rate guarantees the survival also in the case of relatively low

347 infectivity, if the infective prey forms large part of the predator's diet.

348

349 Extinction of the predator leads to the "prey only" equilibrium  $\dot{C} = K_C, \dot{S} = I = 0$ . The

350 linearized dynamics of the predator-prey interaction at the equilibrium can be

351 presented as

$$352 \quad J = \begin{bmatrix} J_{11} & J_{12} & J_{13} \\ J_{21} & J_{22} & J_{23} \\ J_{31} & J_{32} & J_{33} \end{bmatrix} = \begin{bmatrix} -r_C & -aK_C & e_{IC}\mu_{inf} \\ 0 & r_S - K_C a(e_{SI}\alpha - e_{CS}(1-\alpha)) - \mu_I & \beta \\ 0 & ae_{SI}\alpha K_C & -(\mu_I + \mu_{inf} + \beta) \end{bmatrix}$$

353

354 The first eigenvalue of the Jacobian matrix  $J$  is  $\lambda_1 = -r_C$ . The remaining two

355 eigenvalues depend on the submatrix with line 1 and column 1 deleted in the Jacobian

356 matrix  $J$ . The real parts of the eigenvalues  $\lambda_2, \lambda_3$  are both negative if and only if [21]

$$357 \quad J_{22} + J_{33} = r_S - K_C a(e_{SI}\alpha - e_{CS}(1-\alpha)) - \mu_I - (\mu_I + \mu_{inf} + \beta) < 0$$

358 and

$$359 \quad \begin{aligned} J_{22}J_{33} - J_{23}J_{32} &= -[r_S - K_C a(e_{SI}\alpha - e_{CS}(1-\alpha)) - \mu_I](\mu_I + \mu_{inf} + \beta) - \beta ae_{SI}\alpha K_C \\ &> 0 \end{aligned}$$

360 The proportion of the infective prey  $\alpha$  is crucial. Assume that  $\alpha = 0$ . Then  $J_{22}J_{33} - J_{23}$

361  $J_{32} = -[r_S + K_C a - \mu_I](\mu_I + \mu_{inf} + \beta) < 0$  indicating that the predator does not become

362 extinct. Assume next that  $\alpha = 1$ . Then  $J_{22} + J_{33} < 0$  if

$$363 \quad r_S - \mu_I - (\mu_I + \mu_{inf} + \beta) < K_C ae_{SI}$$

364 and  $J_{22}J_{33} - J_{23}J_{32} > 0$  if  $-K_C ae_{SI}(\mu_I + \mu_{inf}) - (r_S - \mu_I)(\mu_I + \mu_{inf} + \beta) > 0$ ,

365 indicating that the predator will become extinct.

19

366

367 Under these conditions the predator becomes extinct. Fig 6 presents how the change  
368 in infectivity  $e_{SI}$  together with the different infective prey proportions affect the  
369 extinction of predator. If the prey's growth rate  $r_C$  is at all positive, the prey can drive  
370 the predator to extinction. Interestingly, if  $r_C > 0$  the level of growth rate does not  
371 affect the results.

372

373 **Fig 6. Extinction of predator depends on the volume of infective prey consumption.**

374 If the infective prey forms a large fraction of the available prey population, lower prey  
375 infectivity  $e_{SI}$  and predator attack rate are needed to eradicate the predator. To the  
376 contrary, if the infective fraction  $\alpha$  is small, or the infectivity  $e_{SI}$  is low, the predator  
377 prevails. Using the parameters for *A. japonicus* and *V. splendidus* the predator survives  
378 always if  $\alpha < 0.011$ . At very low attack rate or infectivity the predator does not consume  
379 enough of the infective prey to suffer extinction. In the case of a specialist prey, when  
380  $r_C = 0$ , it can not drive the predator to extinction. However, as long as  $r_C > 0$ , then the  
381 extinction does not depend on the rate of growth.

382

## 383 **Discussion and conclusions**

384 We have presented a new predator-prey model with partial role reversal where the  
385 predator can become a target of attacks by the prey such that the prey can use the  
386 predator as a resource for growth. We parametrized the model using sea cucumber *A.*  
387 *japonicus* and a bacterium species *V. splendidus* as a model system.

20

388 A distinctive feature in our model is that both the prey and the predator are only a  
389 part of a food web. Both species have an environmental growth rate that is  
390 independent of their mutual interaction, and they both are able individually to grow  
391 to their respective carrying capacity. Thus, both the prey and the predator are  
392 generalists. The predator can benefit from the infective prey through eating the  
393 increasing prey population. The final size of the predator population depends on the  
394 proportion of infective prey in its diet. A small proportion of very infective prey  
395 functions similarly with a large proportion of less infective prey.

396 Overall, the partial role reversal in the predator prey community stabilizes the  
397 predator-prey interaction. The same effect is observed if we add logistic growth to  
398 both species in the Lotka-Volterra equation. We did not observe in our extensive  
399 simulations any signs of instability in the coexistence solutions

400 We also analysed the conditions for species extinction. A generalist predator becomes  
401 eradicated if some part of the prey population is infective, the infection can cause  
402 mortality, and the abundance of the infective prey is high. For a specialist predator the  
403 extinction depends on the infectivity of the prey, and its population size as well as the  
404 attack rate of the predator. The extinction of the prey is possible if its infectivity is low  
405 and either it the infective prey forms only a small fraction of total prey population or  
406 the growth rate is low.

407 The infective prey-predator model departs from a predator-non infective prey model  
408 by quantifying the infectivity of the prey and the mortality of the infection. In  
409 principle, this resembles a fatal infectious disease. However, the predator is also able  
410 to consume the prey regardless of its pathogenicity, and can therefore benefit from

21

411 the growing pathogenic prey population. It is noteworthy that infection does not need  
412 to be a bacterial infection. Any similar situation can play the part of a disease in the  
413 model framework. The examples include a shoal of young pikes can that attract a  
414 growing number of sticklebacks [3]. In these examples, the infectivity is taken as a  
415 number that describes the ability of the prey to find potential victims among the  
416 predators and to attract the rest of the prey population to the site. The infection  
417 mortality describes the probability of death of an infected or attacked predator.

418 The system consisting of a predator and an infective prey remains mostly an  
419 unresearched subject. The population model presented here describes the process of  
420 role reversal using several parameters. However, of these parameters only a few were  
421 in the model markedly involved in the role reversal process. These include the prey to  
422 predator and predator to prey conversion efficiencies, and the infectivity of the prey.  
423 This implies that it would be possible to address the subject empirically by studying a  
424 suitable pair of model organisms.

425 Aquaculture provides many opportunities to find both scientifically and economically  
426 interesting targets for basic and applies research. Also, agriculture can be considered  
427 as a field that would benefit from the research.

428 For the purposes of enhancing sea cucumber cultivation, factorial experiments  
429 manipulating the growth conditions of the non-pathogenic vs. pathogenic bacteria as  
430 food could be set up. One avenue on this would be for example a biological control  
431 [22] of *Vibrio* using specific lytic bacteriophages continuously or periodically added to  
432 the culturing ponds. Bacteriophages are commonly species specific and can be mass-  
433 produced in bioreactors. In practise, *Vibrio* phages could be isolated from raw water

22

434 samples by filtering out the bacteria and adding the filtrate on *Vibrio* pure culture to  
435 amplify only *Vibrio*-specific phages.

## 436 **Acknowledgements**

437 We thank Raine Kortet for useful discussions.

## 438 **References**

- 439 1. Barkai A, McQuaid C. Predator-prey role reversal in a marine benthic  
440 ecosystem. *Science* 1988; 242(4875): 62-64.
- 441 2. Sánchez-Garduño F, Miramontes P, Marquez-Lago T. Role reversal in a  
442 predator-prey interaction. *R Soc Open Sci* 2014;1:140186.
- 443 3. Nilsson J, Flink H, Tibblin P. Predator-prey role reversal may impair the  
444 recovery of declining pike populations. *Journal of Animal Ecology* 2019; 88  
445 (6): 927-939.
- 446 4. Sun J, Zhang L, Pan Y, Lin C, Wang F, Kan R, et al. Feeding behavior and  
447 digestive physiology in sea cucumber *Apostichopus japonicus*. *Physiology &*  
448 *Behavior* 2015; 139: 336-343.
- 449 5. Xu Q, Hamel J-F, Mercier A. Chapter 10 - Feeding, digestion, nutritional  
450 physiology, and bioenergetics. *Developments in Aquaculture and Fisheries*  
451 *Science* 2015; 39: 153-175.
- 452 6. Bratbak G. Bacterial biovolume and biomass estimations. *Applied and*  
453 *Environmental Microbiology* 1985; 49(6):1488-1493.
- 454 7. Watson SW, Novitsky TJ, Quinby HL, Valois FW. Determination of bacterial

455 number and biomass in the marine environment. *Applied and Environmental*  
456 *Microbiology* 1977; 33(4): 940-946.

457 8. Liu X, Zhou Y, Yang H, Ru S. Eelgrass detritus as a food source for the sea  
458 cucumber *Apostichopus japonicus* Selenka (Echinodermata: Holothuroidea) in  
459 coastal waters of north China: An experimental study in flow-through systems.  
460 *PLOS ONE* 2013; 8(3): e58293

461 9. Kennish MJ. *Encyclopedia of estuaries*. 2016, Springer Netherlands, ISBN 978-  
462 94-017-8800-7.

463 10. Xu H, Wang L, Bao X, Jiang N, Yang X, Hao Z, et al. Microbial communities  
464 in sea cucumber (*Apostichopus japonicus*) culture pond and the effects of  
465 environmental factors. *Aquaculture Research* 2019; 50: 1257-1268.

466 11. Vezzulli L, Pezzati E, Stauder M, Stagnaro L, Venier P, Pruzzo, C. Aquatic  
467 ecology of the oyster pathogens *Vibrio splendidus* and *Vibrio aestuarianus*.  
468 *Environmental Microbiology* 2015; 17(4): 1065-1080.

469 12. Deng H, He C, Zhou Z, Liu C, Tan K, Wang N, et al. Isolation and  
470 pathogenicity of pathogens from skin ulceration disease and viscera ejection  
471 syndrome of the sea cucumber *Apostichopus japonicas*. *Aquaculture* 2009; 287  
472 (1-2): 18-27.

473 13. Liu N, Zhang S, Zhang W, Li C. *Vibrio* sp. 33 a potential antagonist of *Vibrio*  
474 *splendidus* pathogenic to sea cucumber (*Apostichopus japonicus*). *Aquaculture*  
475 2017; 470: 68-73.

476 14. Zhang Z, Lv Z, Zhang W, Shao Y, Zhao X, Guo M, et al. Comparative analysis  
477 of midgut bacterial community under *Vibrio Splendidus* infection in  
478 *Apostichopus japonicus* with hindgut as a reference. *Aquaculture* 2019a; 513:

479 734427.

480 15. Zhang Z, Zhang W, Hu Z, Li C, Shao Y, Zhao X, et al. Environmental factors  
481 promote pathogen-induced skin ulceration syndrome outbreak by readjusting  
482 the hindgut microbiome of *Apostichopus japonicus*. *Aquaculture* 2019 b; 507:  
483 155-163.

484 16. Han Q, Keesing JK, Liu D. A Review of sea cucumber aquaculture, ranching,  
485 and stock enhancement in China. *Reviews in Fisheries Science & Aquaculture*  
486 2016; 24(4): 326-341.

487 17. Yang H, Yuan X, Zhou Y, Mao Y, Zhang T, Liu Y. Effects of body size and  
488 water temperature on food consumption and growth in the sea cucumber  
489 *Apostichopus japonicus* (Selenka) with special reference to aestivation.  
490 *Aquaculture Research* 2005; 36: 1085-1092.

491 18. Yingst JY. The utilization of organic matter in shallow marine sediments by an  
492 epibentic deposit-feeding holothurian *J Exp Mar Biol Ecol* 1976; 23: 55-69.

493 19. Neidhardt FC, Curtiss IR, Ingraham JL, Lin, ECC, Low KB, Magasanic B, et  
494 al., editors. *Escherichia coli and salmonella: Cellular and molecular biology*. 2<sup>nd</sup>  
495 ed. Washington D.C.: ASM Press; 1996.

496 20. Lysenko VN, Zharikov VV, Lebedev AM. The current status of populations of  
497 the sea cucumber *Apostichopus japonicus* (Selenka, 1867) in the Far Eastern  
498 marine reserve. *Russian Journal of Marine Biology* 2018; 44(2): 164-171.

499 21. Edelstein-Keshet, L. *Mathematical models in biology*. 1<sup>st</sup> ed, Random House,  
500 NY, 1988.

501 22. Merikanto I, Laakso JT, Kaitala V. Outside-host phage therapy as a biological



25

502 control against environmental infectious diseases. *Theoretical Biology and*

503 *Medical Modelling* 2018; 15(7).

504

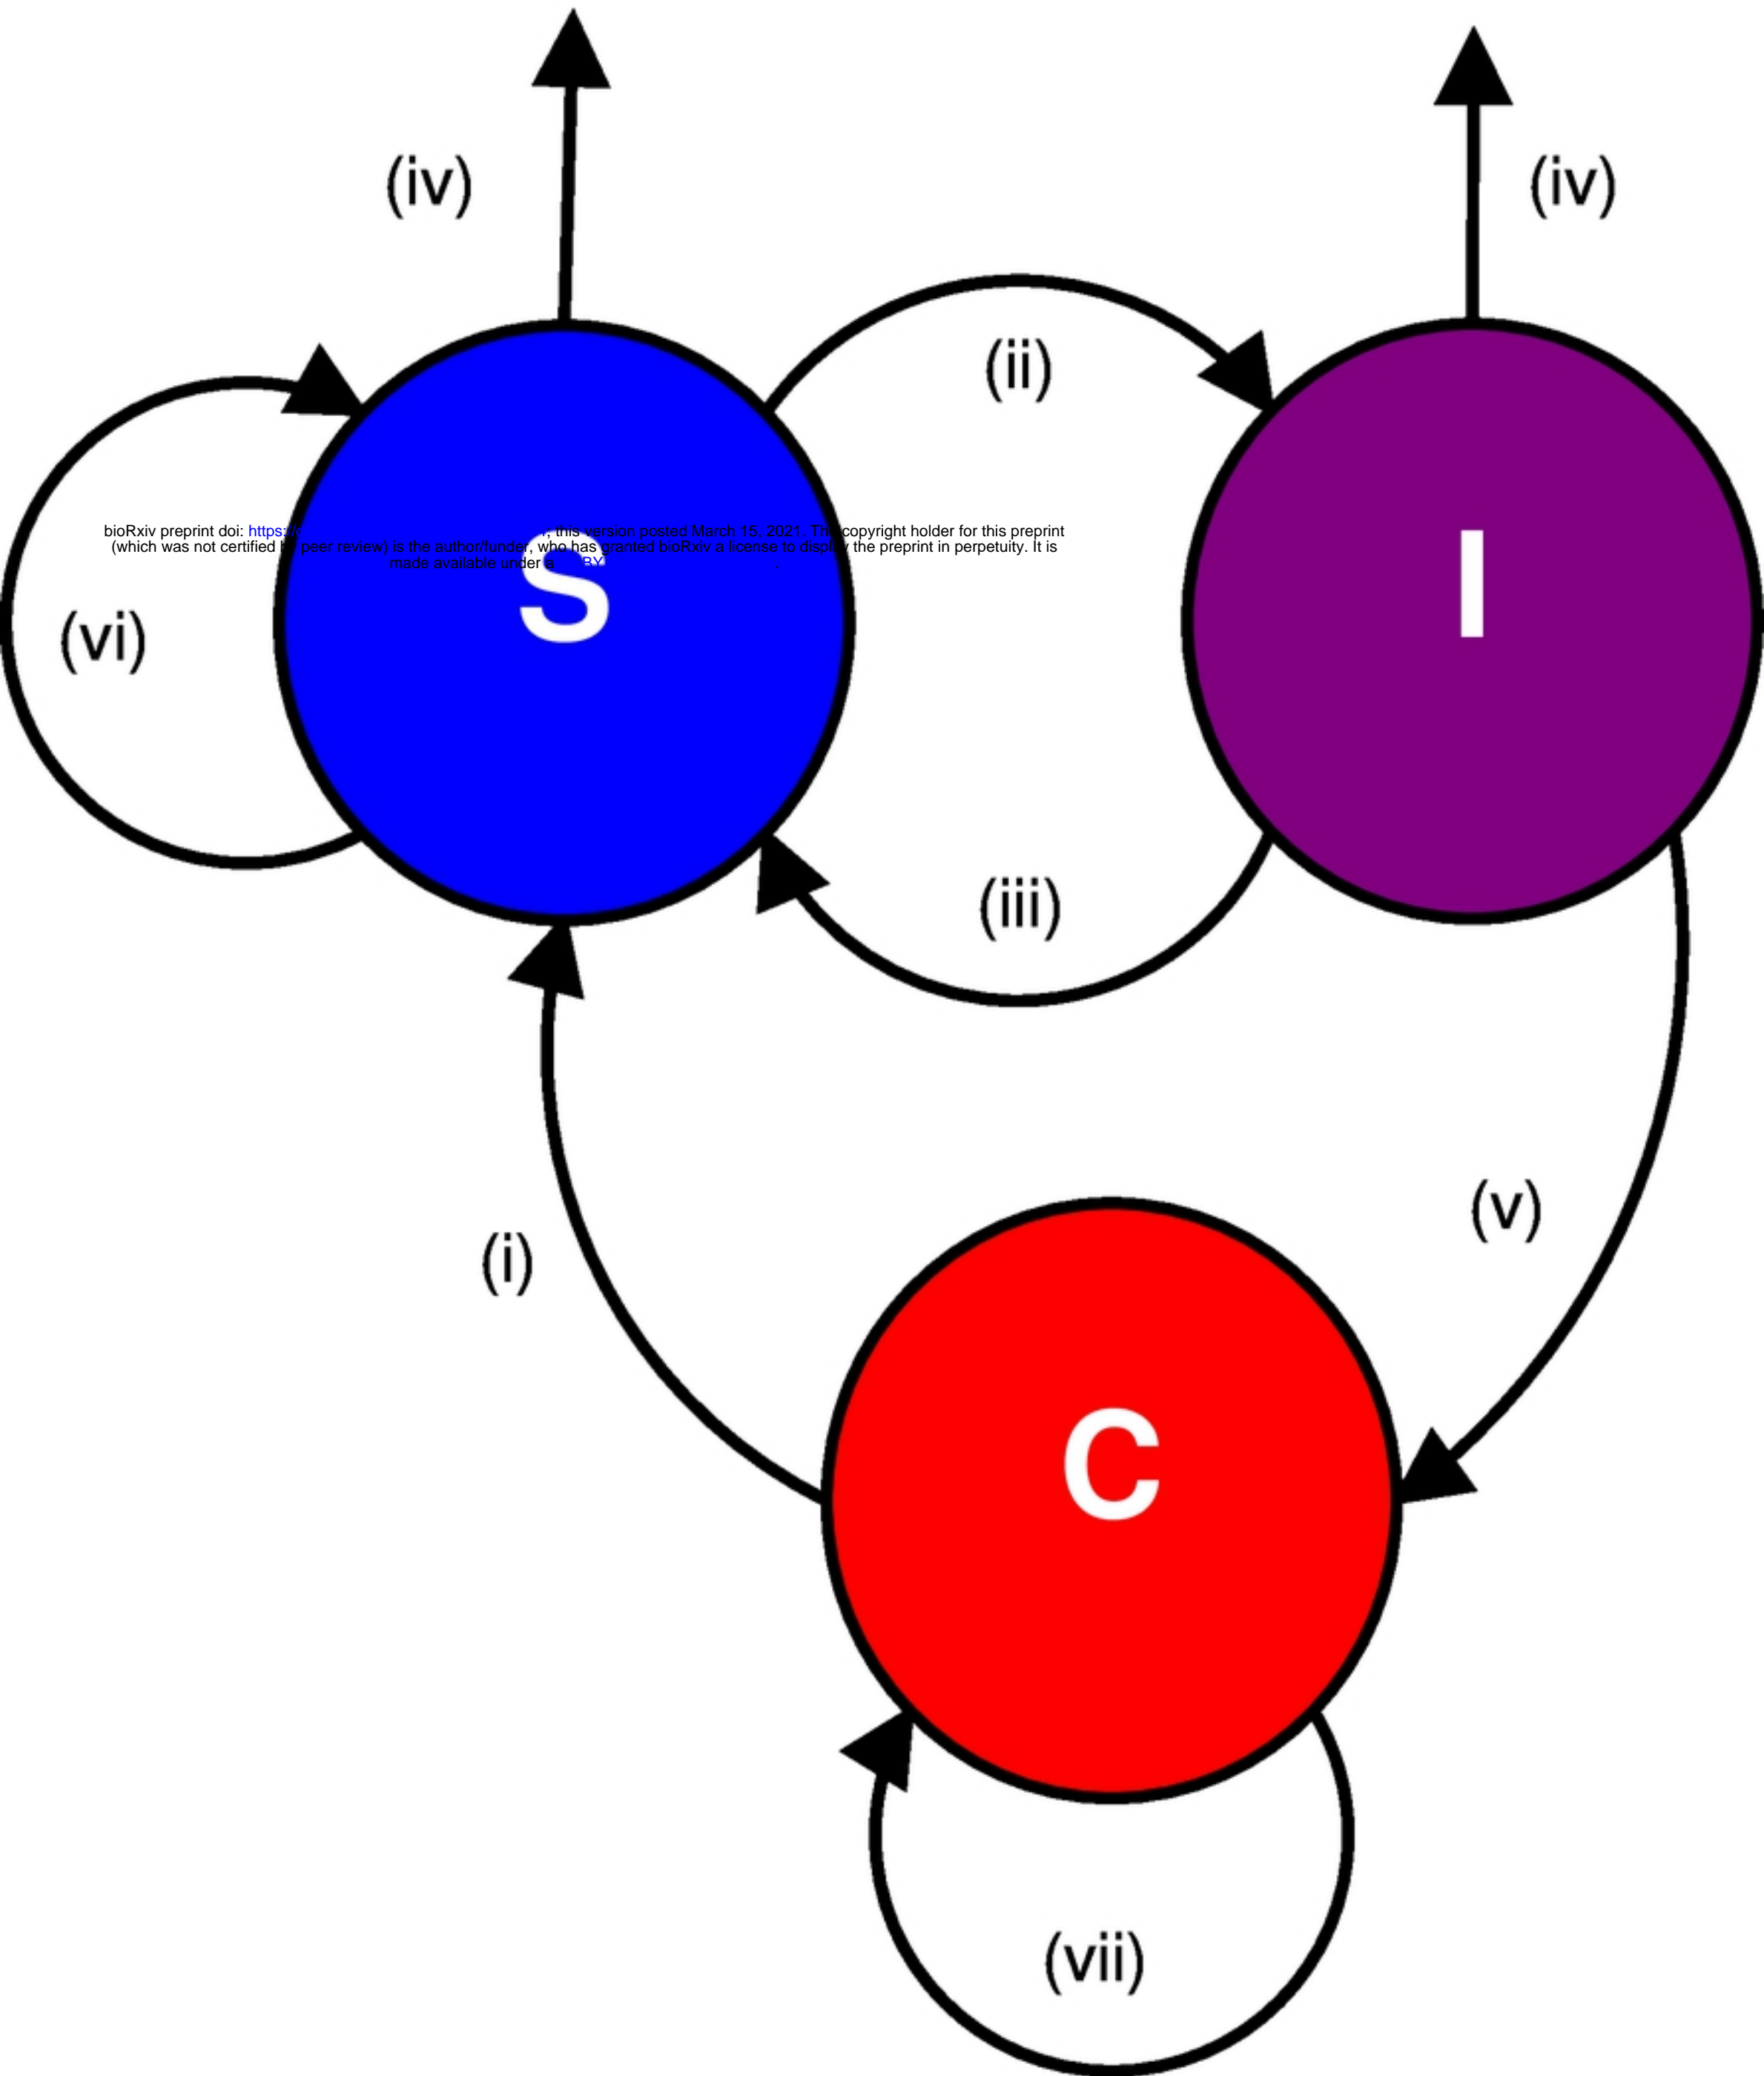

Figure

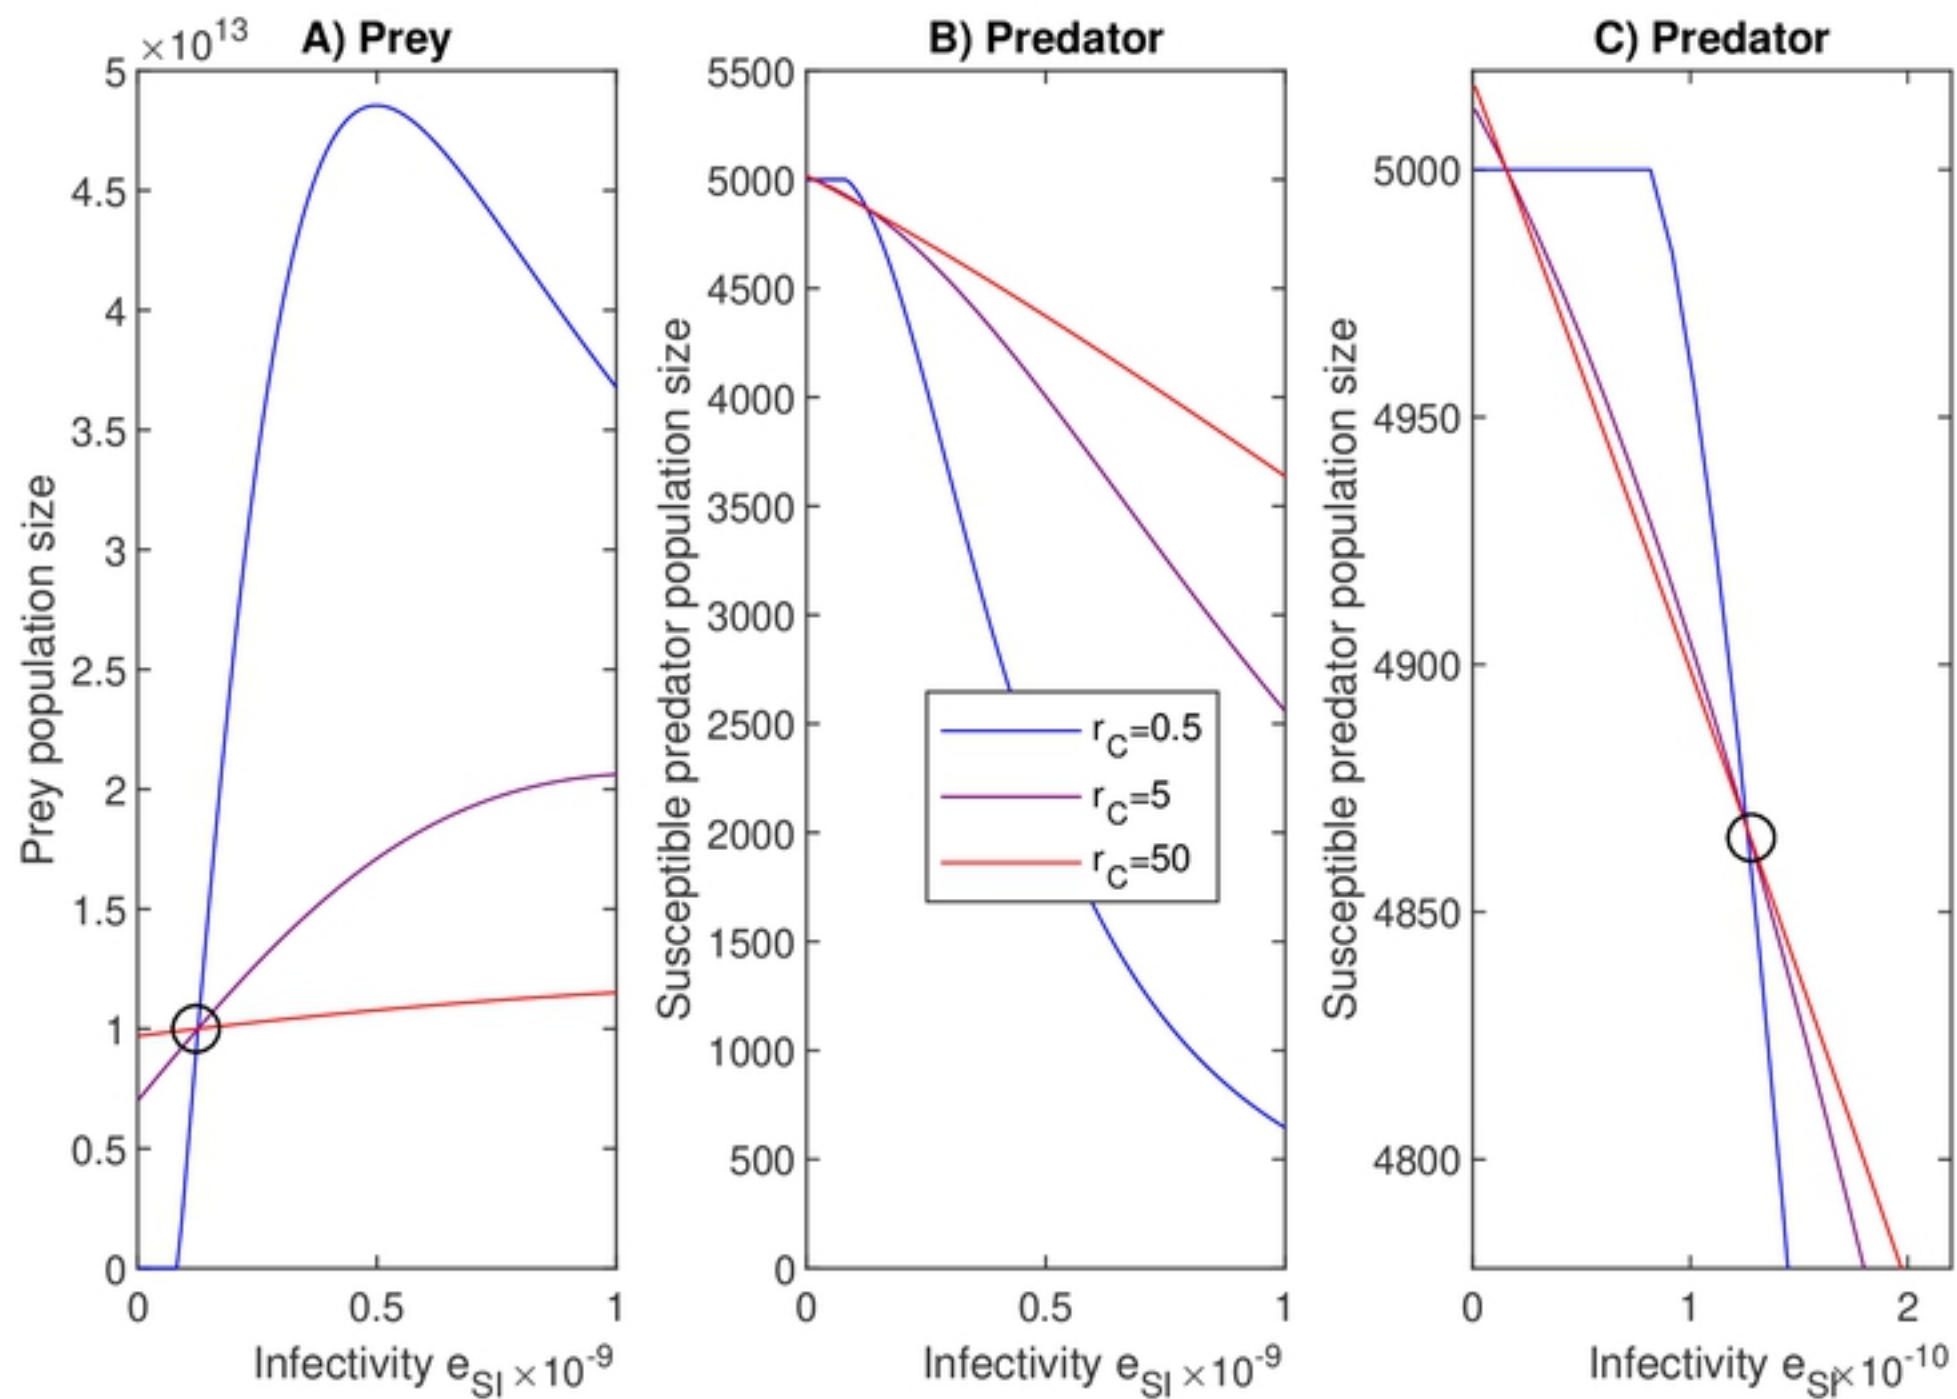

Figure

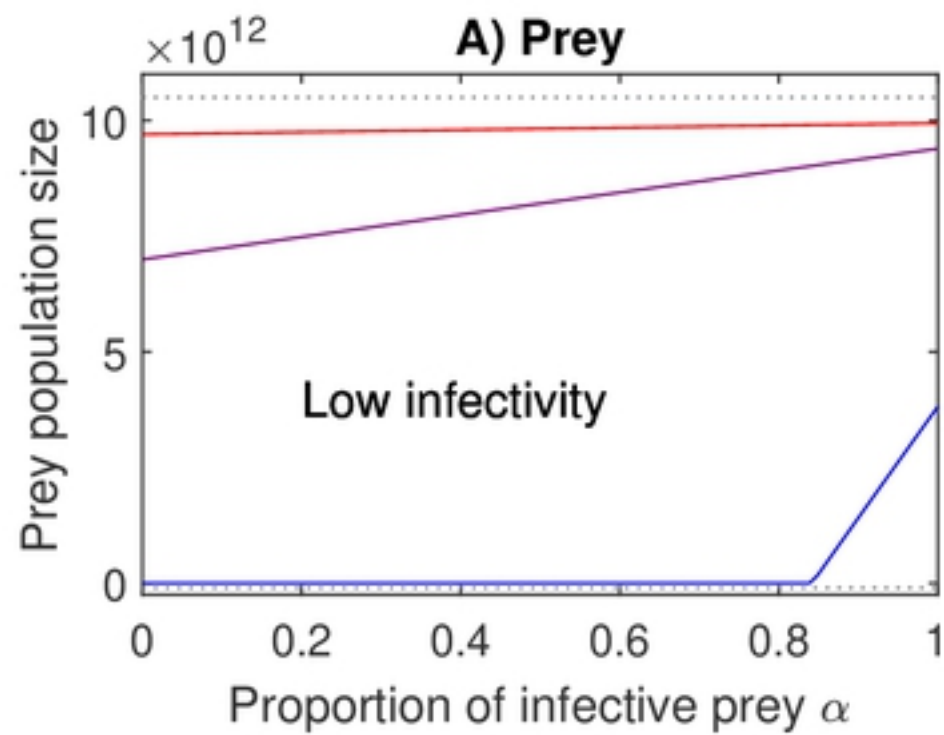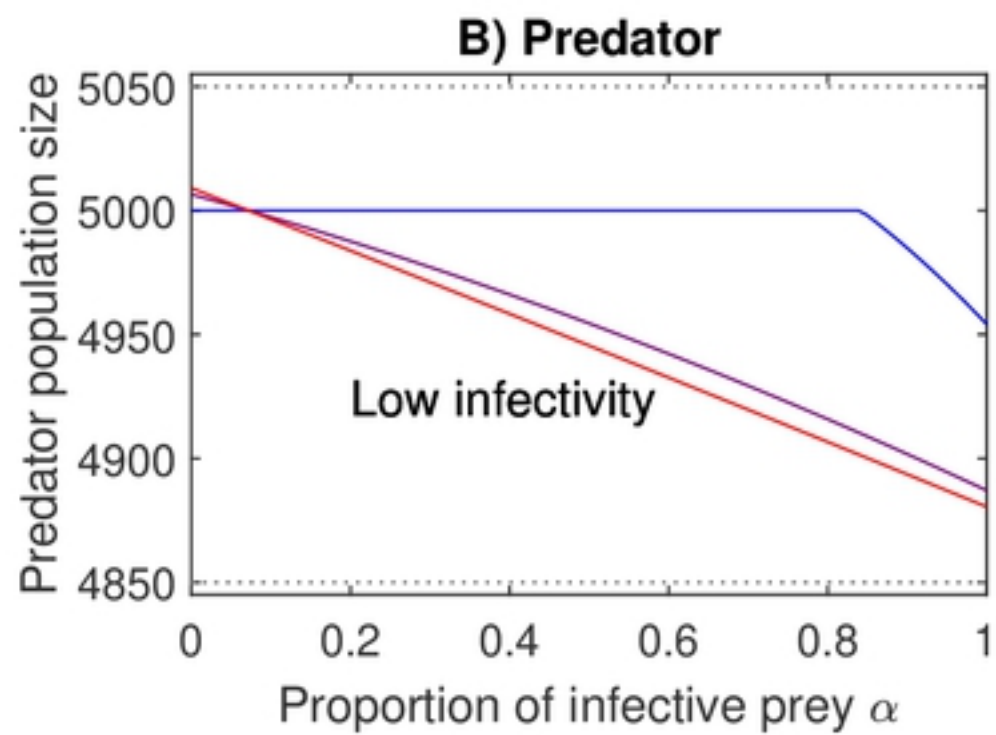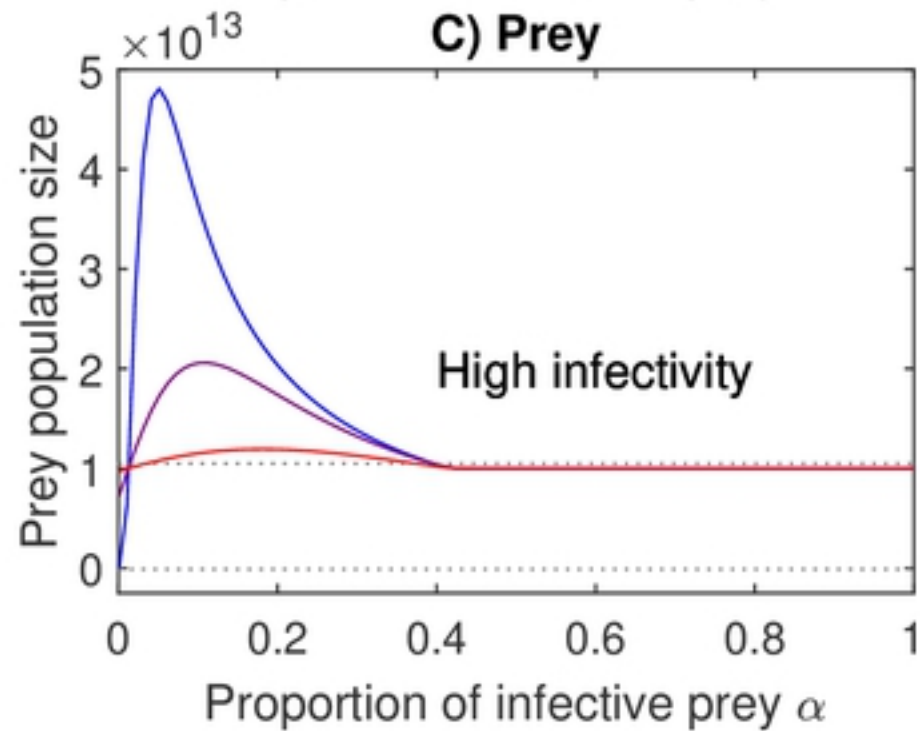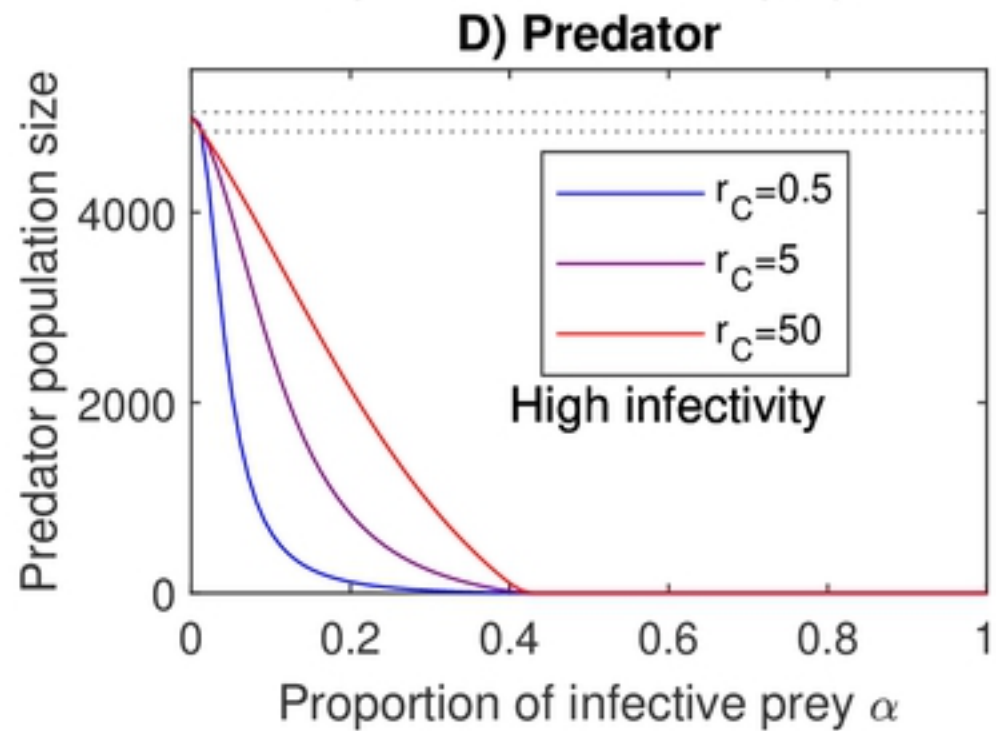

Figure

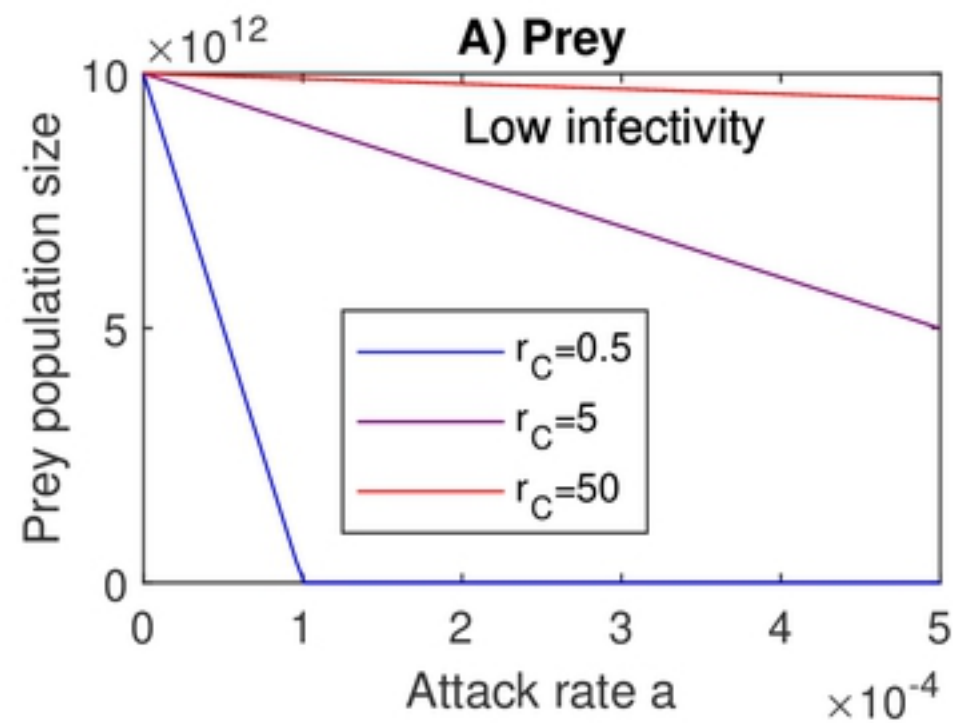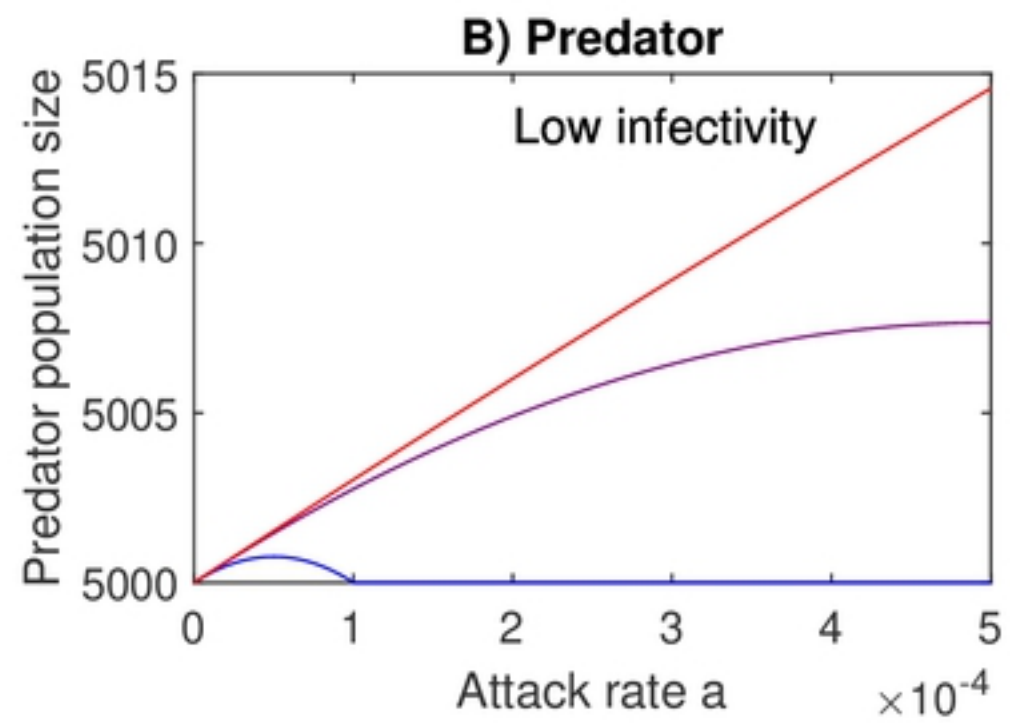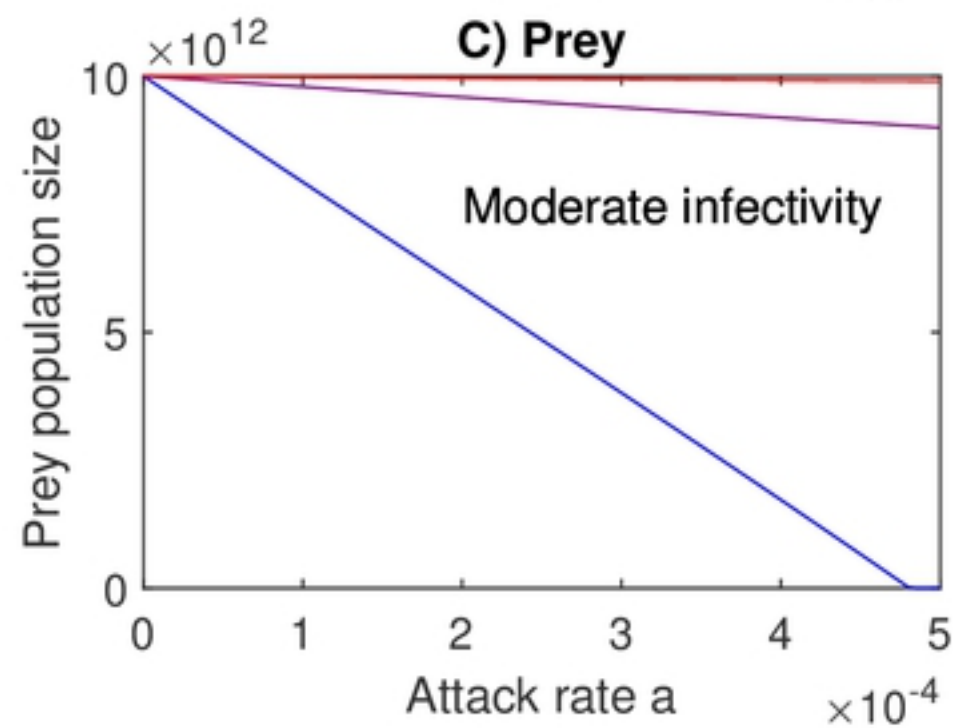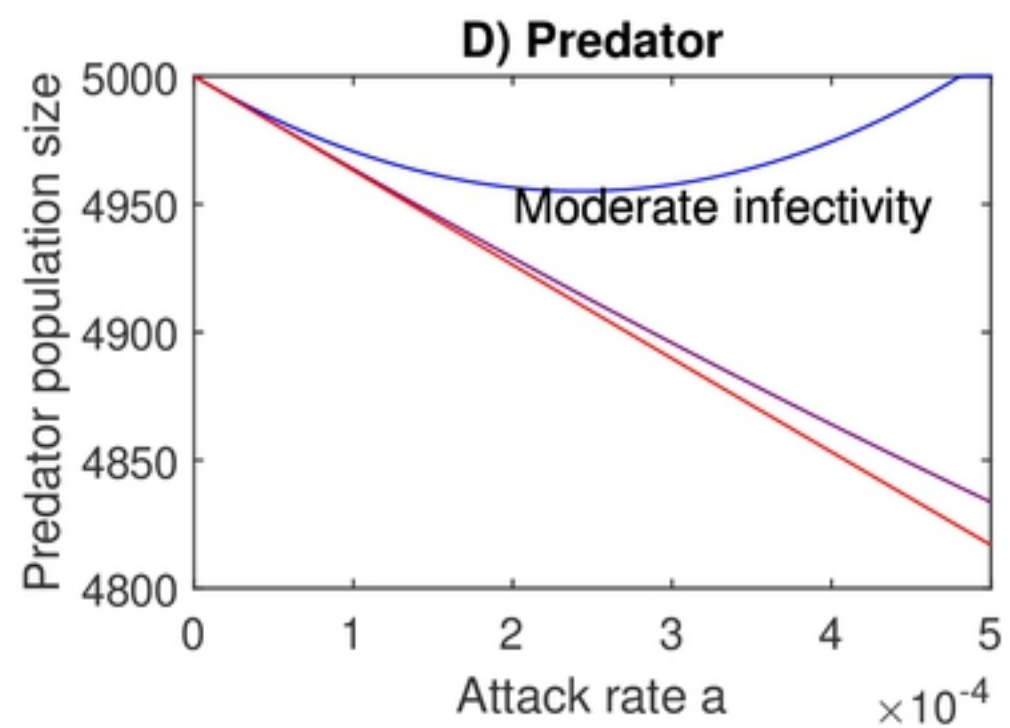

Figure

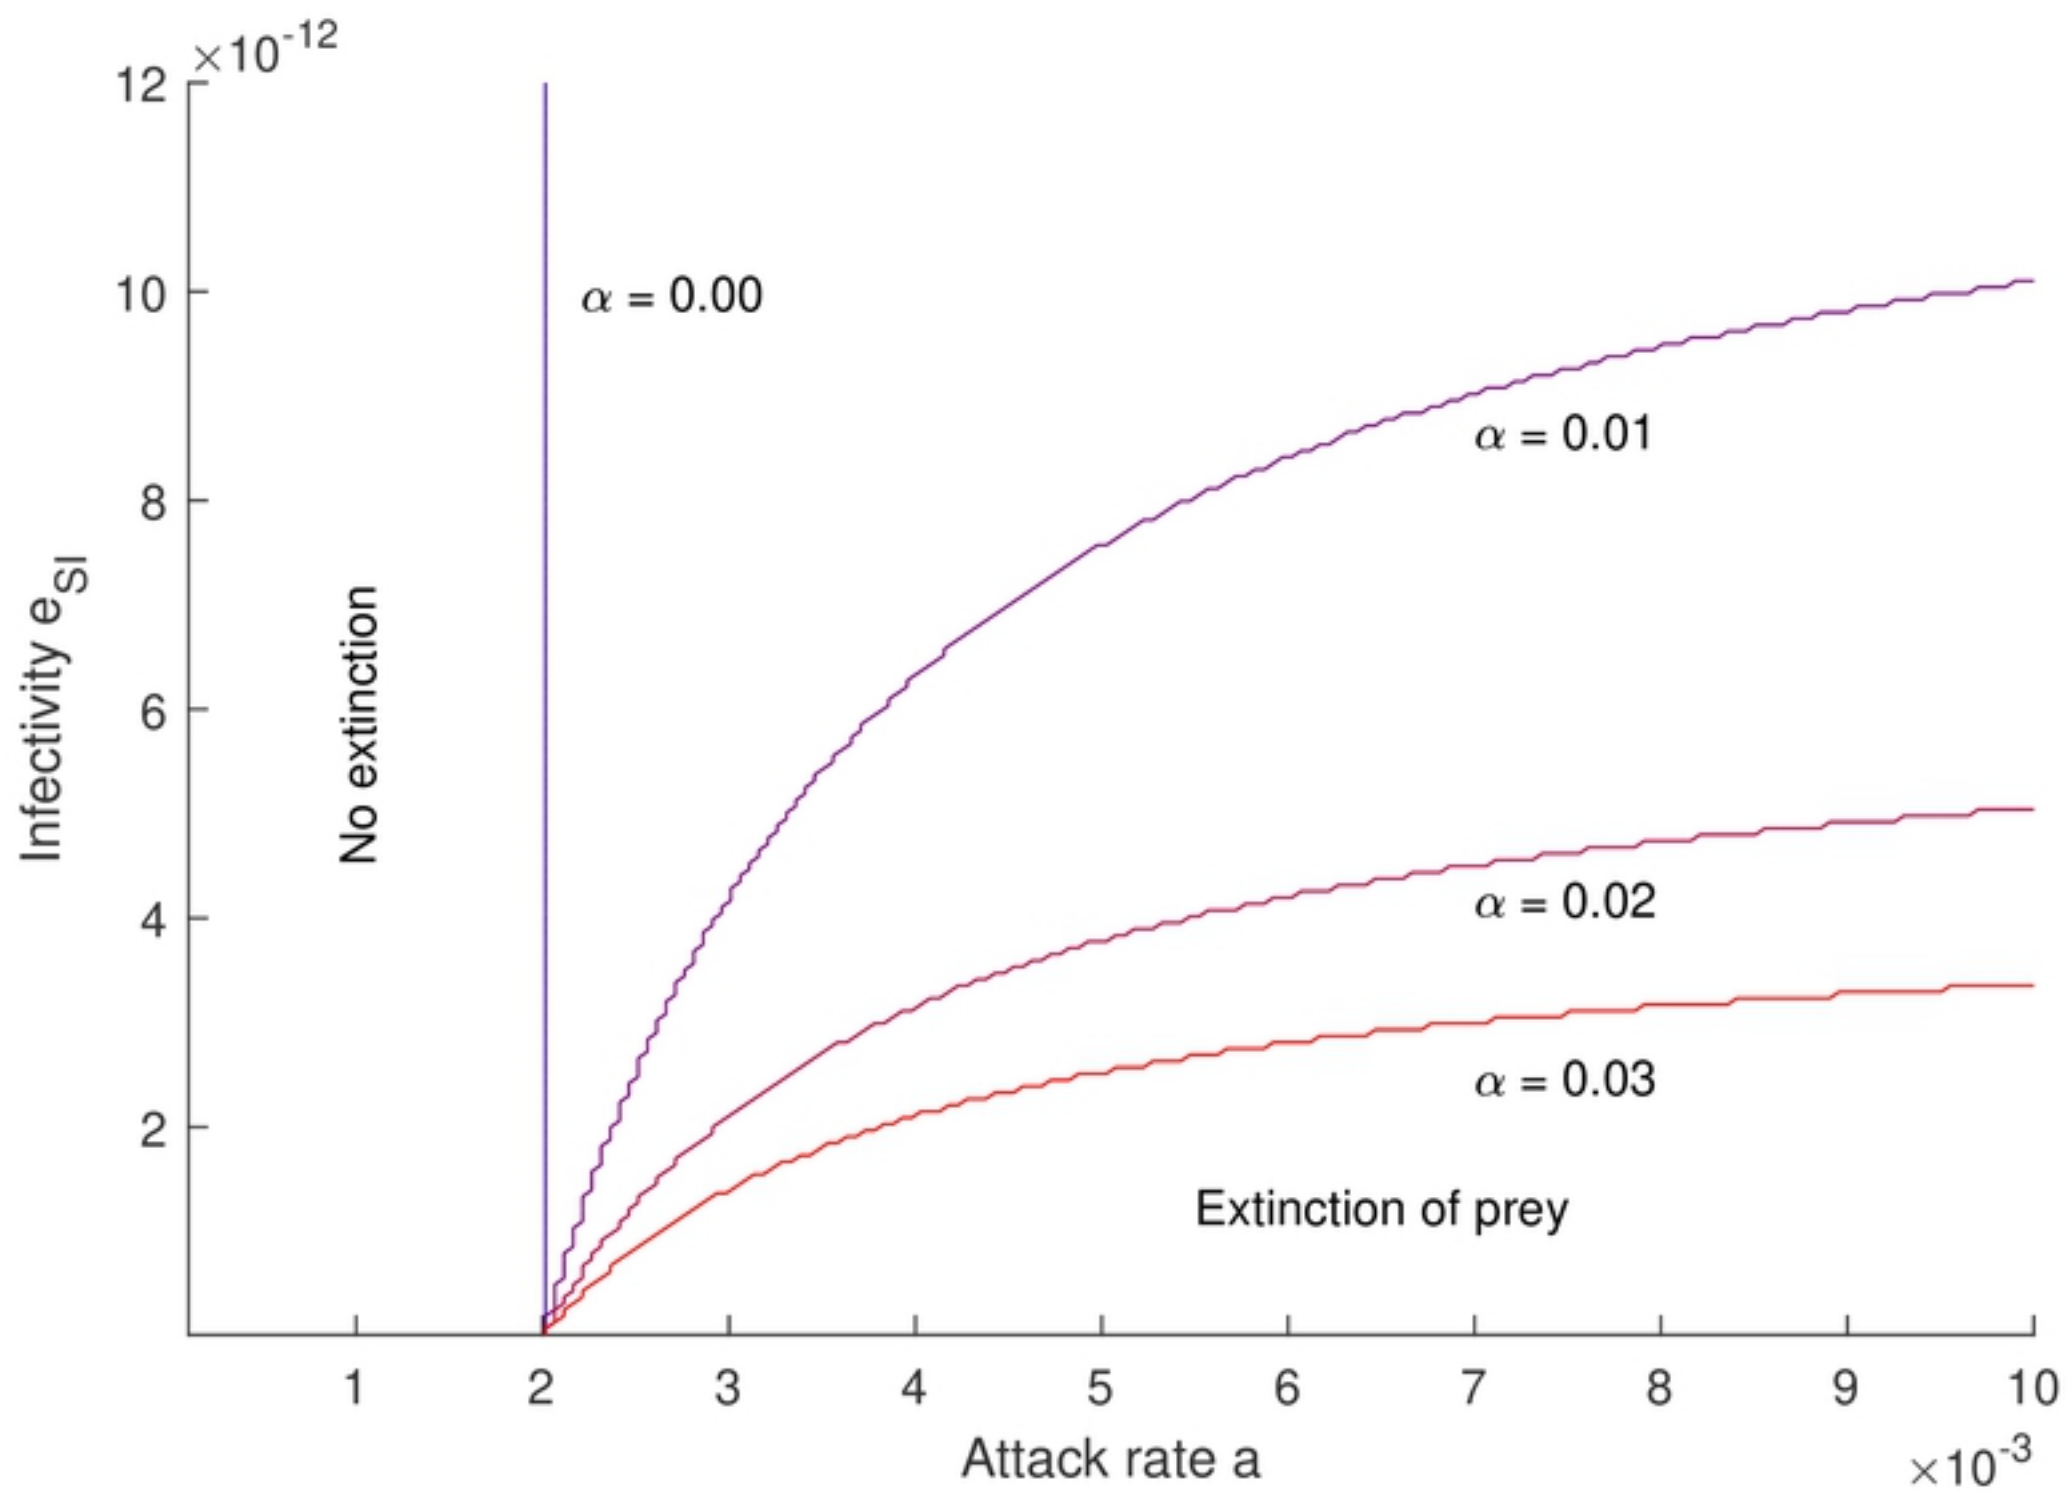

Figure

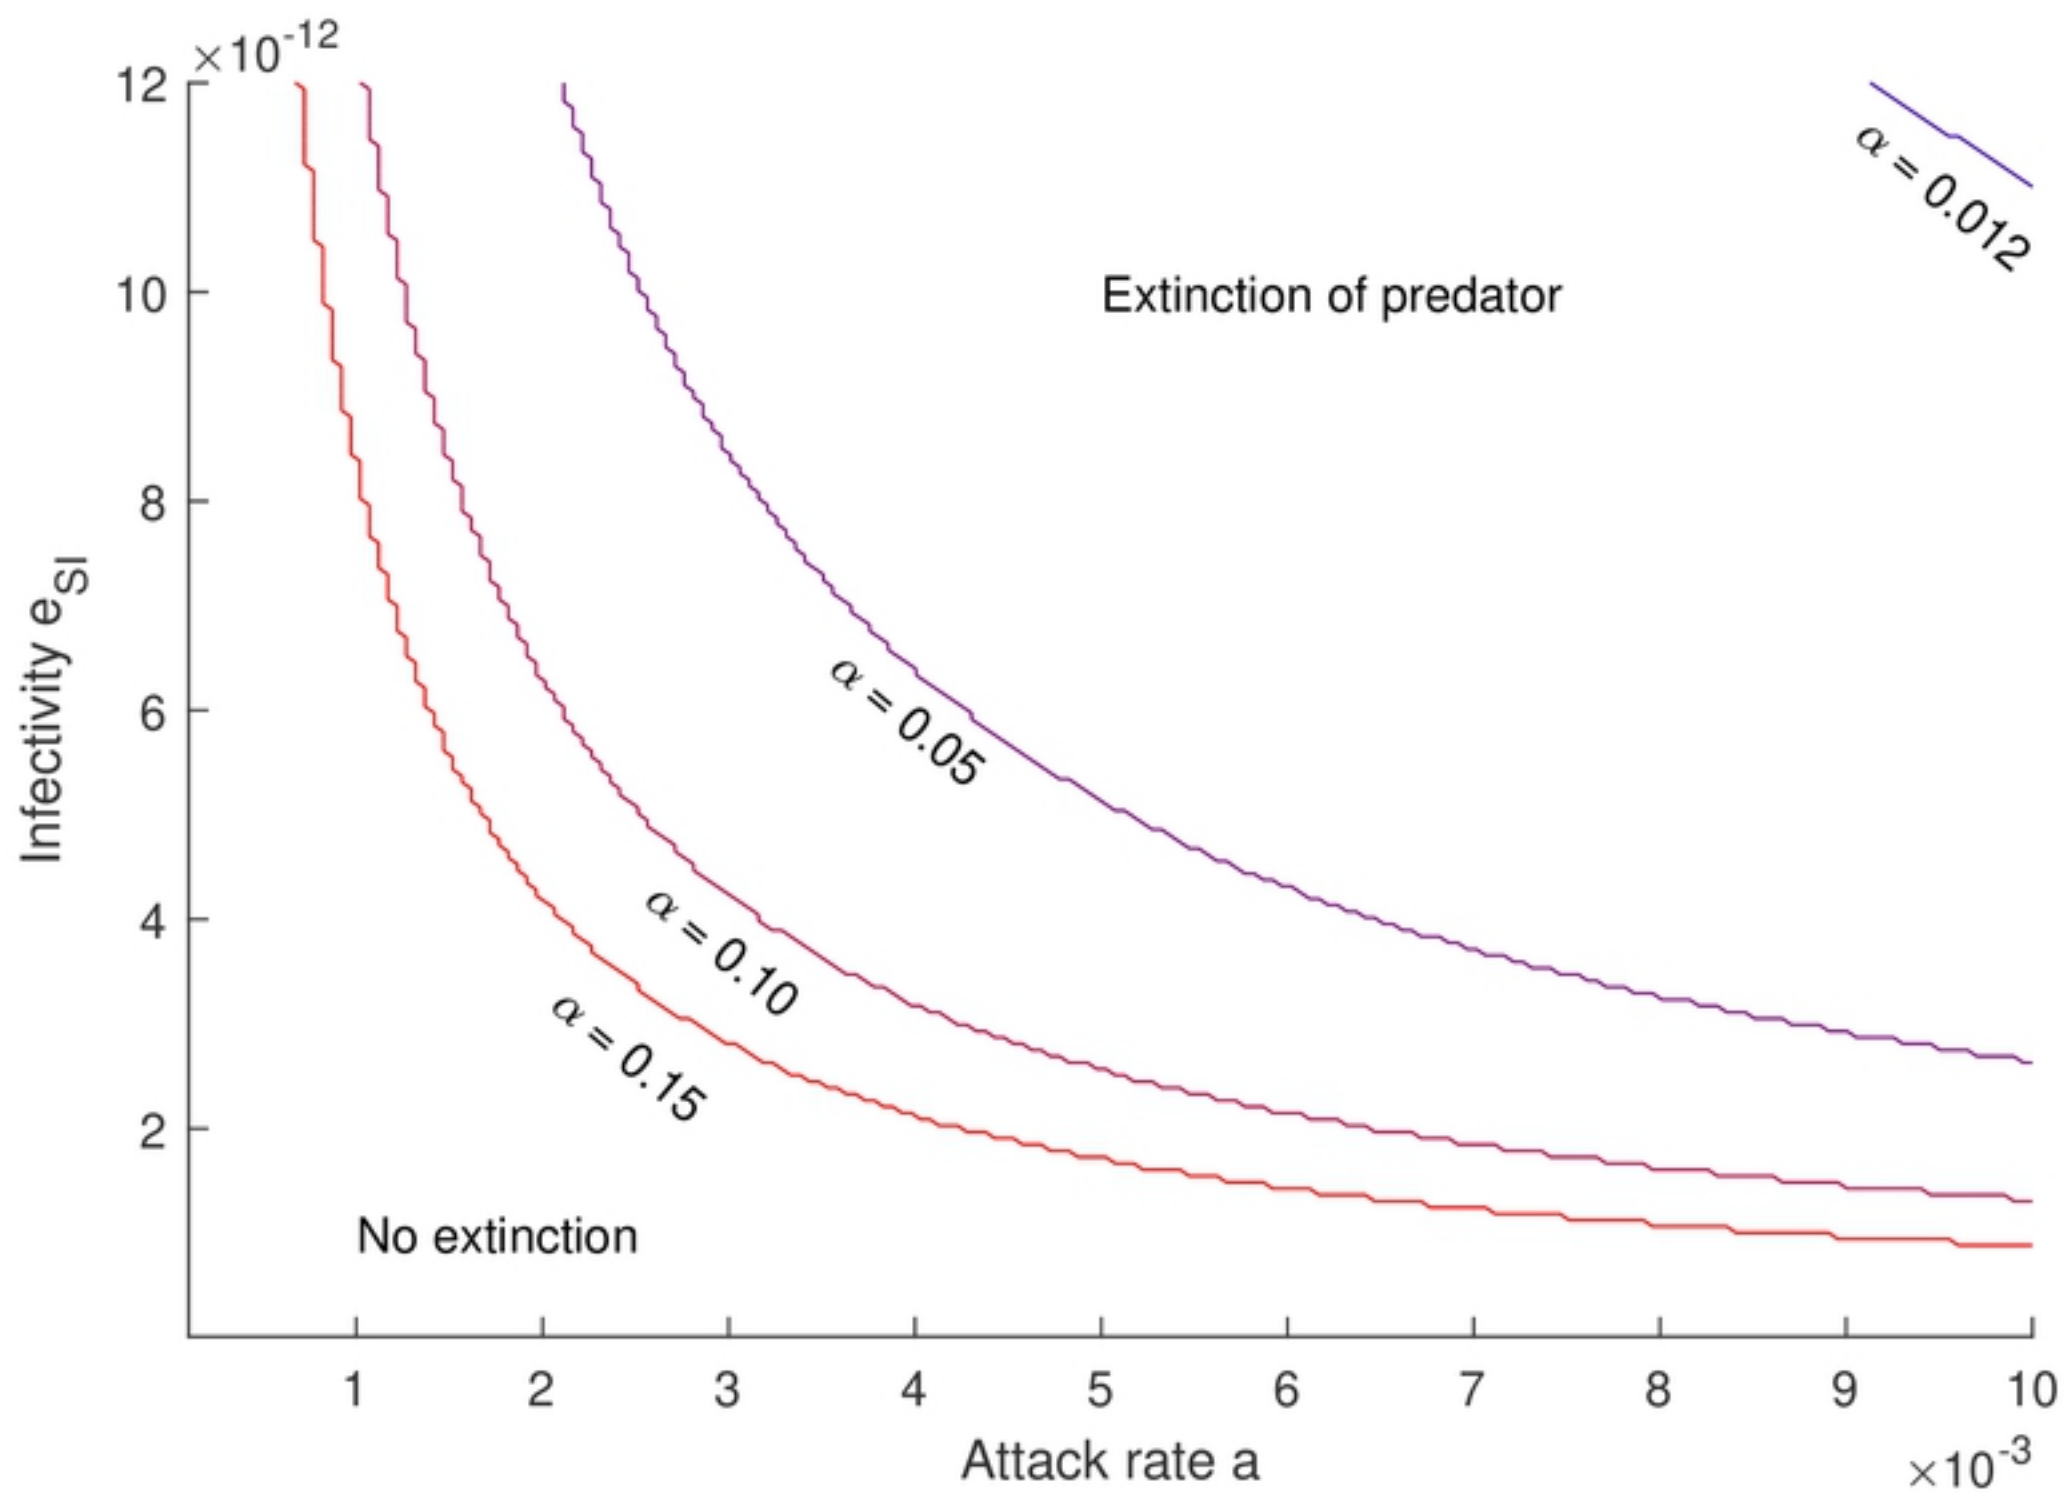

Figure
